# Supplementary material for: Intrinsic valley polarization in 2D magnetic MXenes: surface engineering induced spin-valley coupling
Source: Royal Society of Chemistry journal article supplement (doi:10.1039/d1tc02837e), 2021-01-01
Supplement: d1tc02837e1.pdf [file d1tc02837e1.pdf]

## **Intrinsic Valley Polarization in 2D Magnetic MXenes: Surface Engineering Induced Spin-valley Coupling**

Shuo Li <sup>a</sup>, Junjie He <sup>a,b</sup>, Lukáš Grajciar <sup>a</sup>, and Petr Nachtigall <sup>a\*</sup>

*a Department of Physical and Macromolecular Chemistry & Charles University Center of Advanced Materials, Faculty of Science, Charles University, Hlavova 8, 128 43 Prague 2, Czech Republic*

*b Bremen Center for Computational Materials Science, University of Bremen, Am Fallturm 1, 28359 Bremen, Germany*

\* *Corresponding Author:* Petr Nachtigall

*E-mail:* [petr.nachtigall@natur.cuni.cz](mailto:petr.nachtigall@natur.cuni.cz)

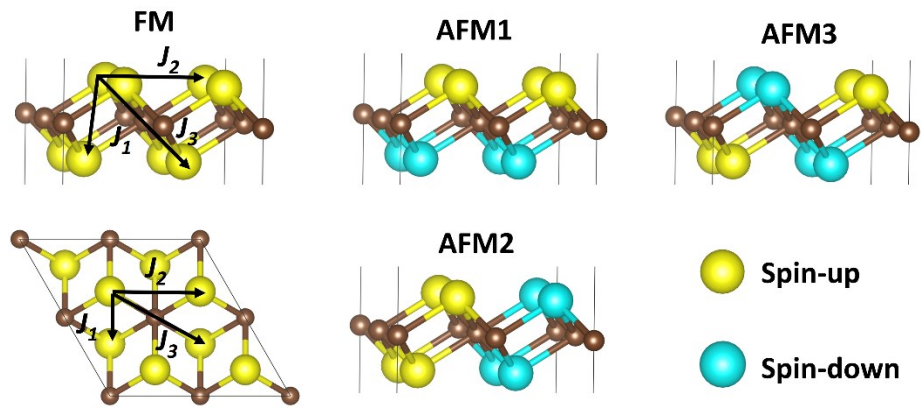

**Fig. S1** Ferromagnetic (FM) and antiferromagnetic (AFM) states for  $\text{Cr}_2\text{C}$  MXenes.

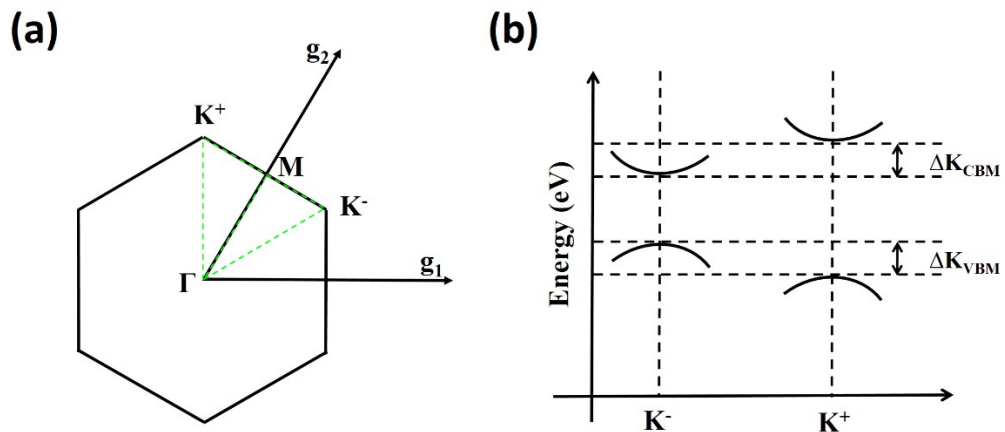

**Fig. S2** (a) The high symmetry points of the first Brillouin zone for the band structure of  $\text{Cr}_2\text{C}$  MXenes. (b) Schematic drawing of the band edge structures at two valleys. Down (up) opening parabolas are used to denote valence band maximum (VBM) and conduction band minimum (CBM).

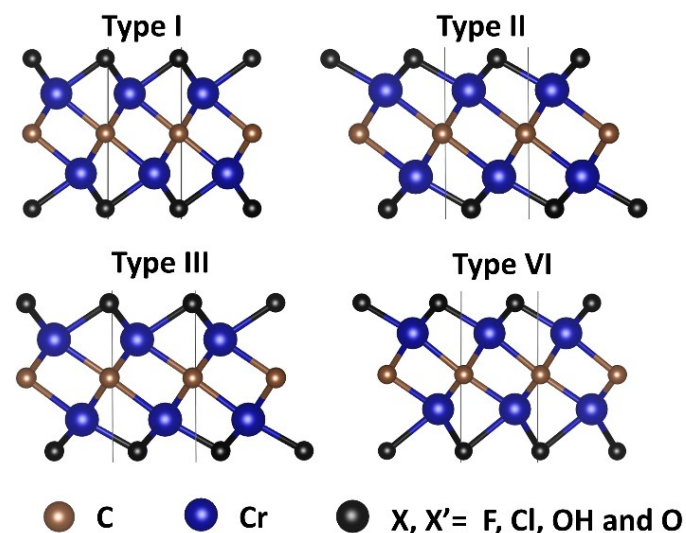

**Fig. S3** Four possible types for functionalized Cr<sub>2</sub>C MXenes.

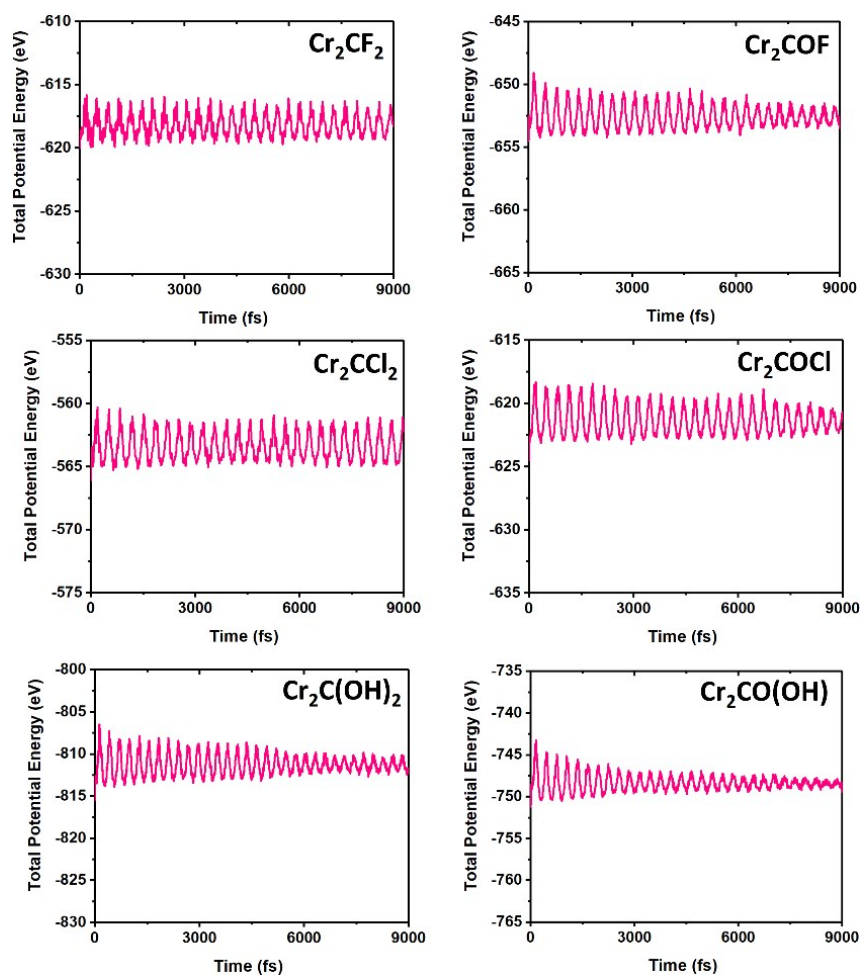

**Fig. S4** Total potential energy of MXenes as a function of simulation time for Cr<sub>2</sub>CX<sub>2</sub> and Cr<sub>2</sub>COX MXenes by using ab-initio molecular dynamics (300K) in 9 ps.

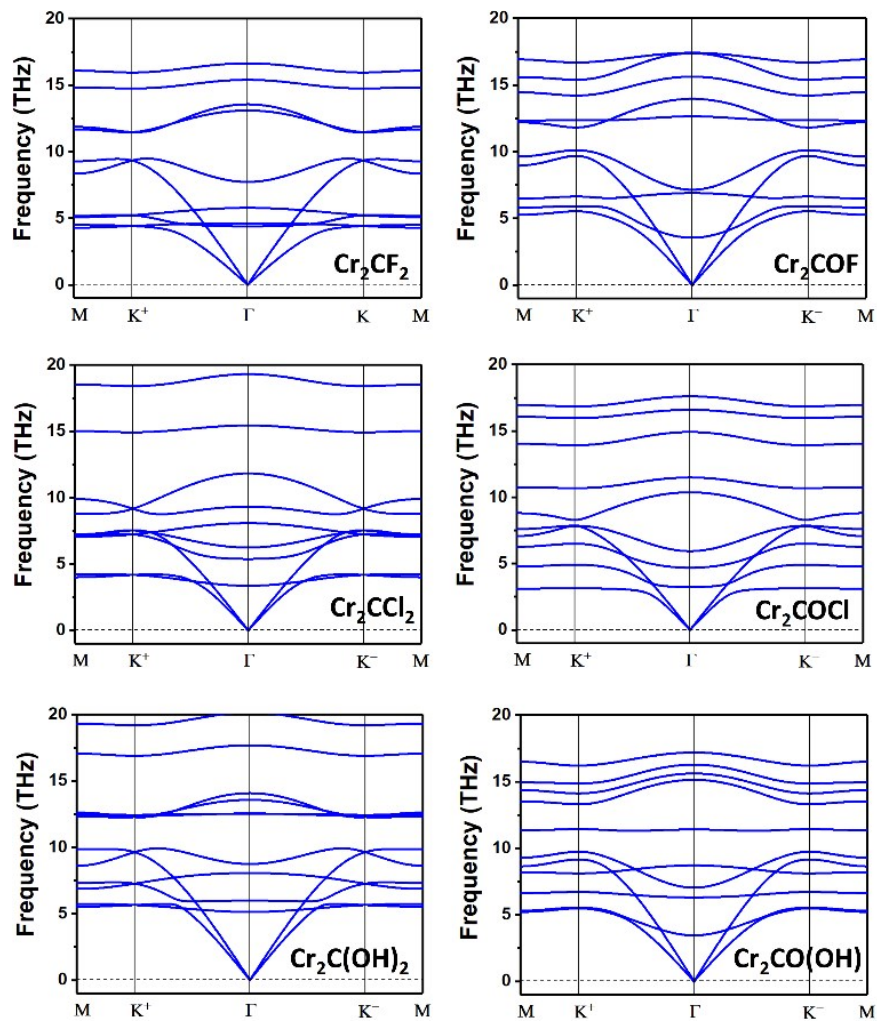

Fig. S5 Phonon spectra for  $\text{Cr}_2\text{CX}_2$  and  $\text{Cr}_2\text{COX}$  MXenes

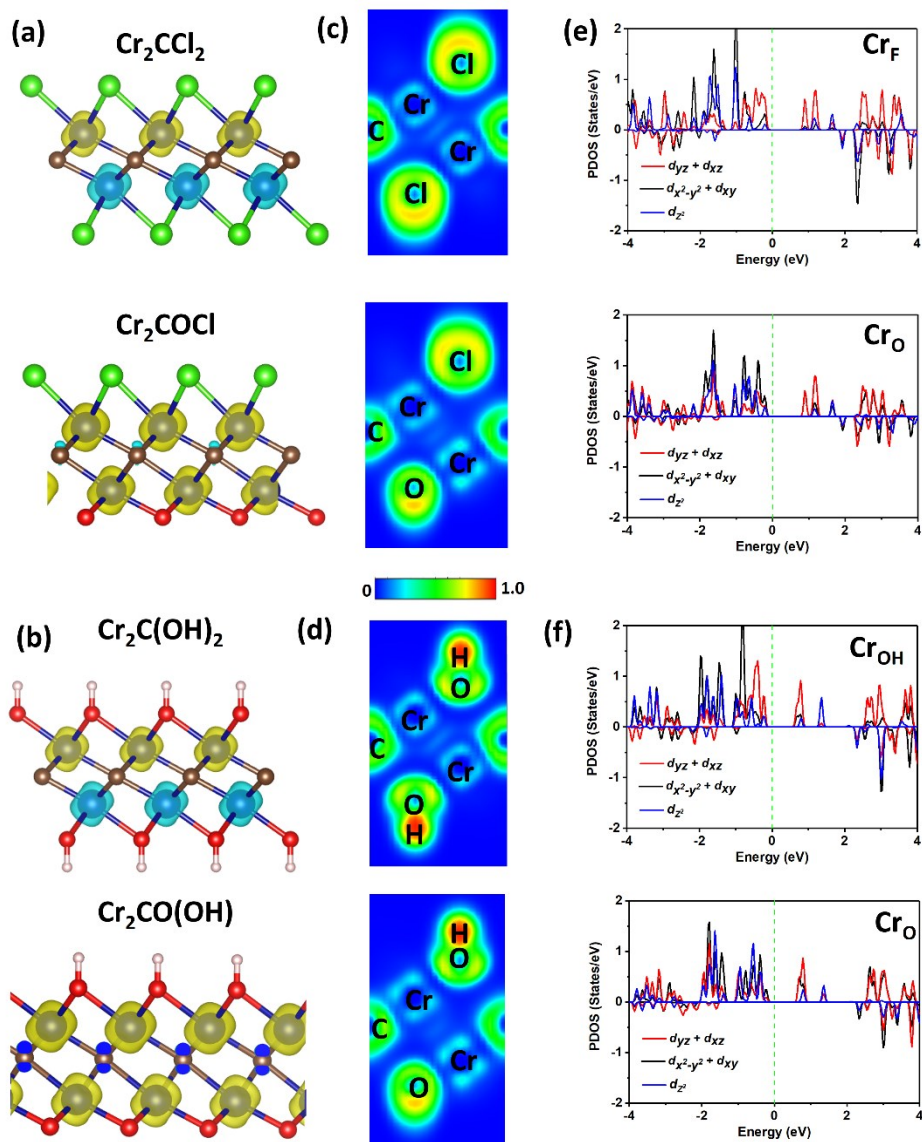

**Fig. S6** Spin polarized charge densities on (a)  $\text{Cr}_2\text{CCl}_2$  and  $\text{Cr}_2\text{COCl}$  and (b)  $\text{Cr}_2\text{C}(\text{OH})_2$  and  $\text{Cr}_2\text{CO}(\text{OH})$  MXenes, where spin-up and spin-down densities are shown in yellow and blue, respectively. The isosurface is  $0.045 \text{ e}^- \text{ Bohr}^{-3}$ . Electron localization functions (ELF) on (c)  $\text{Cr}_2\text{CCl}_2$  and  $\text{Cr}_2\text{COCl}$  and (d)  $\text{Cr}_2\text{C}(\text{OH})_2$  and  $\text{Cr}_2\text{CO}(\text{OH})$  MXenes. The color scale (from 0 to 1) shows the probability. The partial electronic density of states (PDOS) of (e)  $\text{Cr}_2\text{COCl}$  and (f)  $\text{Cr}_2\text{CO}(\text{OH})$  MXenes.

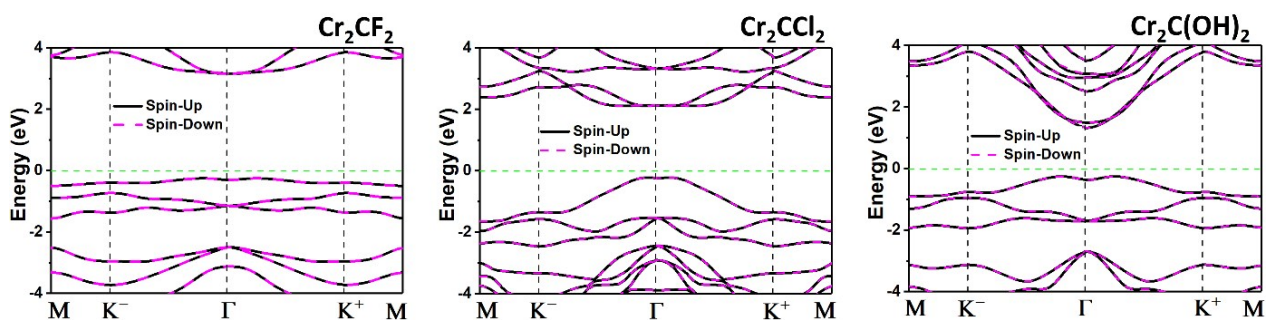

**Fig. S7** Band structures of  $\text{Cr}_2\text{CX}_2$  at HSE06 level. Spin-up and spin-down bands are respectively denoted by black and pink lines.



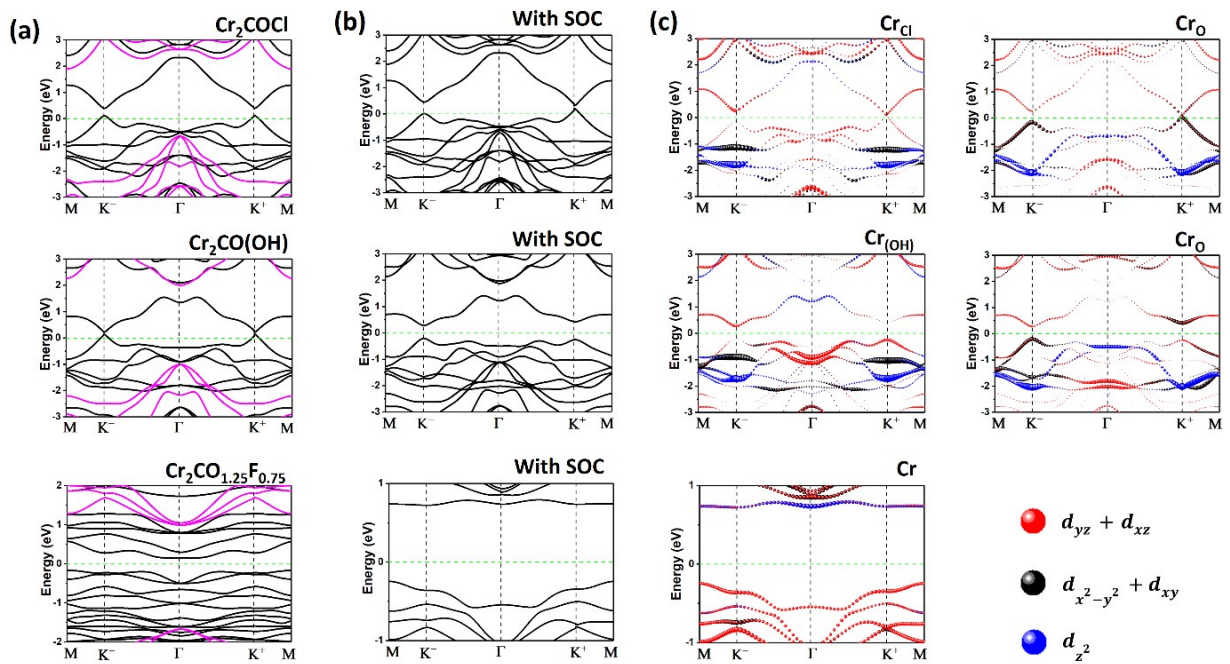

**Fig. S8** (a) Band structures at HSE06 level. Spin-up and spin-down bands are respectively denoted by black and pink lines. (b) Band structures with spin-orbit coupling (SOC). (c) Orbital projected band structures with SOC. Red, black and blue circles represent  $d_{yz} + d_{xz}$ ,  $d_{x^2-y^2} + d_{xy}$  and  $d_{z^2}$  orbital composition. The sizes of the dots denote the weight of contribution. Note that each  $d$  orbital of Cr atoms in mixed MXenes was not further analyzed.

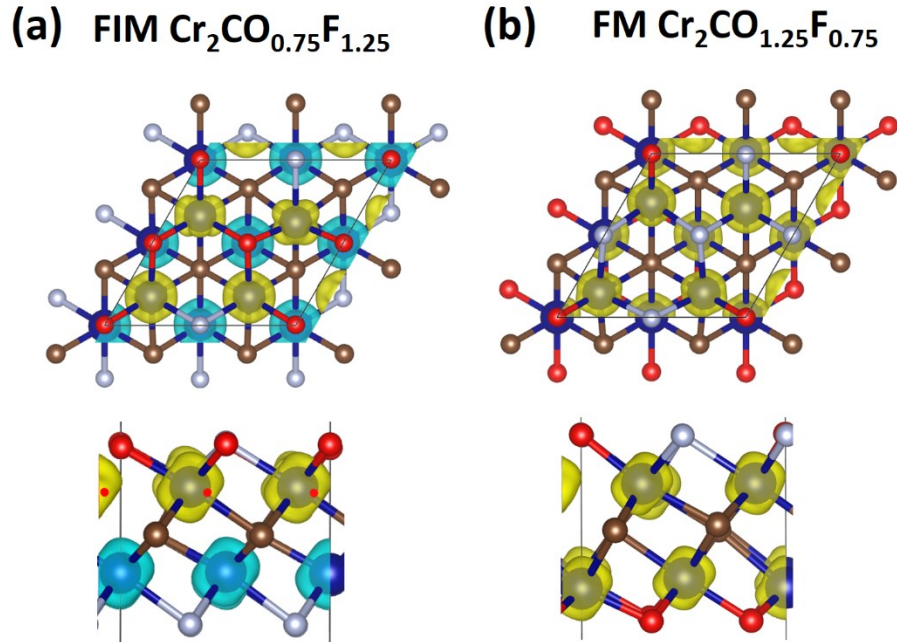

**Fig. S9** Spin polarized charge densities on (a) ferrimagnetic (FIM)  $\text{Cr}_2\text{CO}_{0.75}\text{F}_{1.25}$  (b) ferromagnetic (FM)  $\text{Cr}_2\text{CO}_{1.25}\text{F}_{0.75}$  MXenes, where spin-up and spin-down densities are shown in yellow and blue, respectively. The isosurface is  $0.045 \text{ e} \cdot \text{Bohr}^{-3}$ .

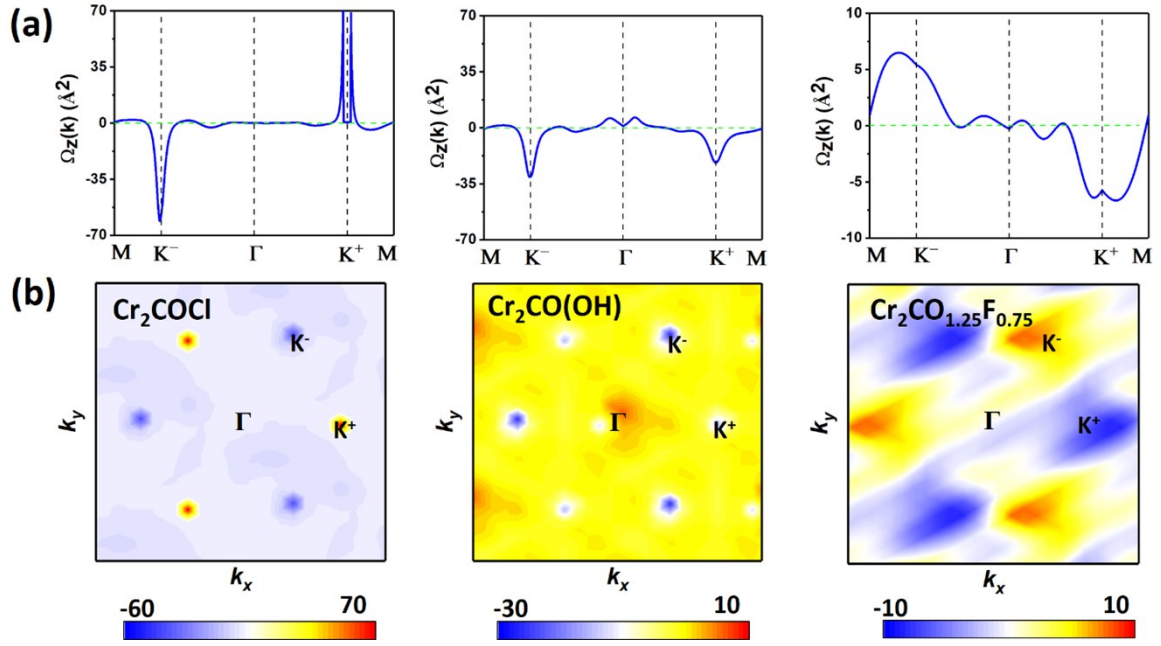

**Fig. S10** Berry curvatures of  $\text{Cr}_2\text{COCl}$ ,  $\text{Cr}_2\text{CO}(\text{OH})$  and  $\text{Cr}_2\text{CO}_{1.25}\text{F}_{0.75}$  along high-symmetry points (a) and in the full Brillouin zone (b). Unit of Berry curvatures is  $\text{\AA}^2$ .

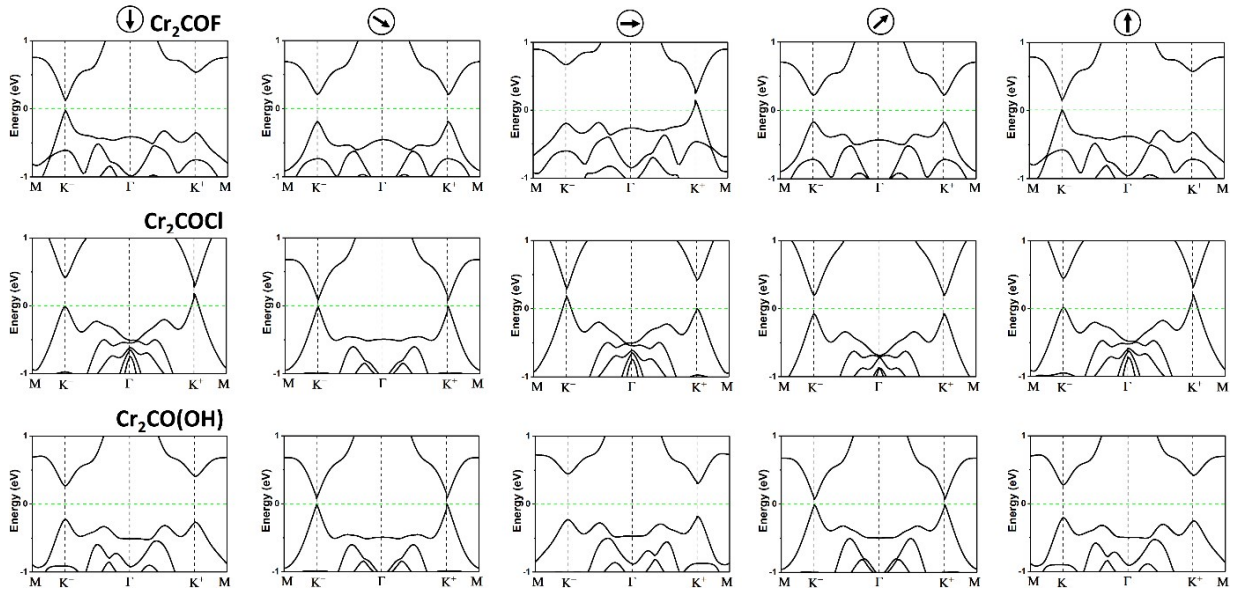

**Fig. S11** Band structures of  $\text{Cr}_2\text{COX}$  with spin-orbit coupling (SOC) at HSE06 level. The black arrows in circles show the magnetization direction ( $\theta$ ) in the  $xz$  plane from  $-90$  to  $90$ .

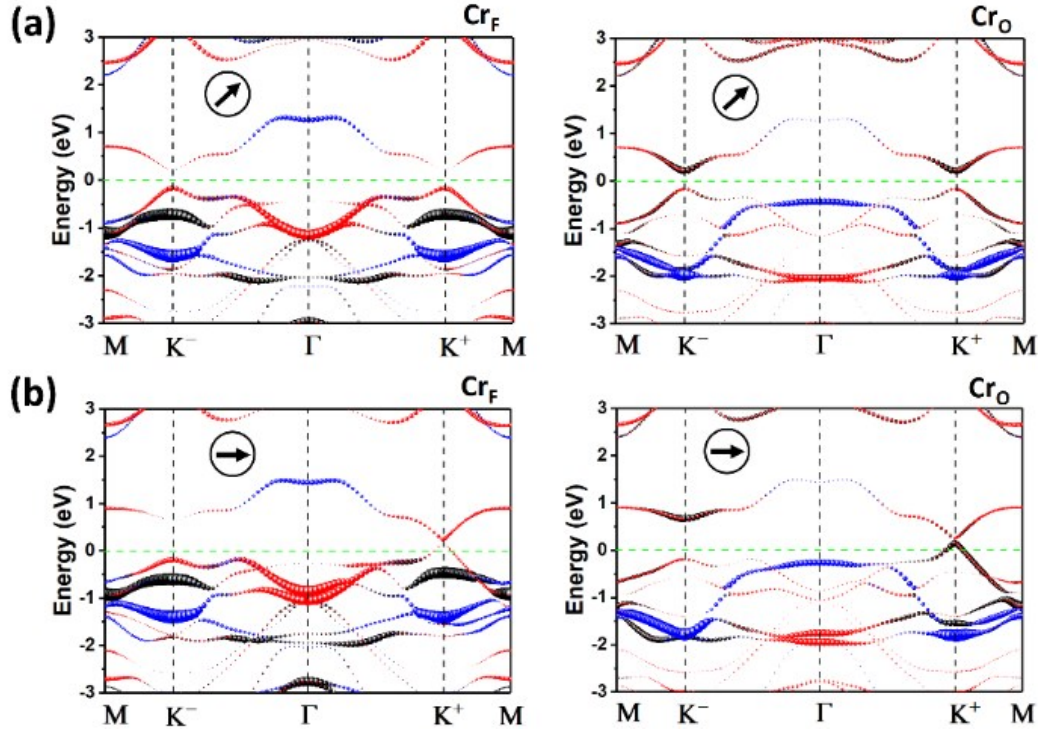

**Fig. S12** Orbital projected band structures of  $\text{Cr}_2\text{COF}$  MXene with SOC when (a)  $\theta = 45$  and (b)  $\theta = 0$ . Red, black and blue circles represent  $d_{yz} + d_{xz}$ ,  $d_{x^2 - y^2} + d_{xy}$  and  $d_{z^2}$  orbital composition. The sizes of dots denote the weight of contribution.

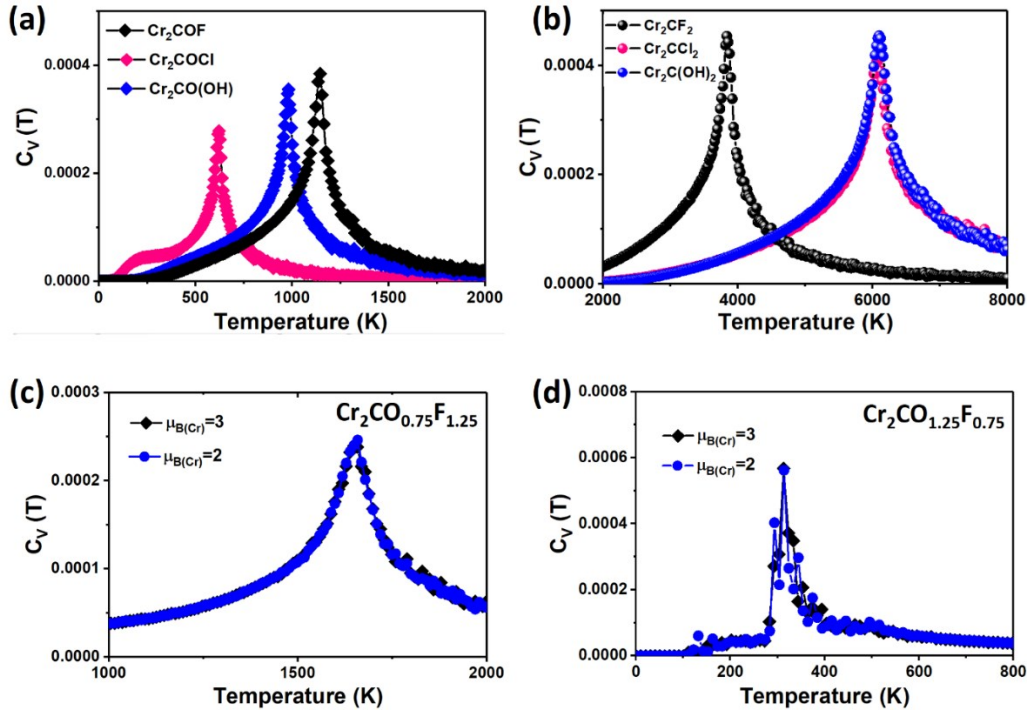

**Fig. S13** Specific heat ( $C_V$ ) calculated for  $\text{Cr}_2\text{CX}_2$ ,  $\text{Cr}_2\text{COX}$  and mixed  $\text{Cr}_2\text{C}$  MXenes with respect to the temperature.



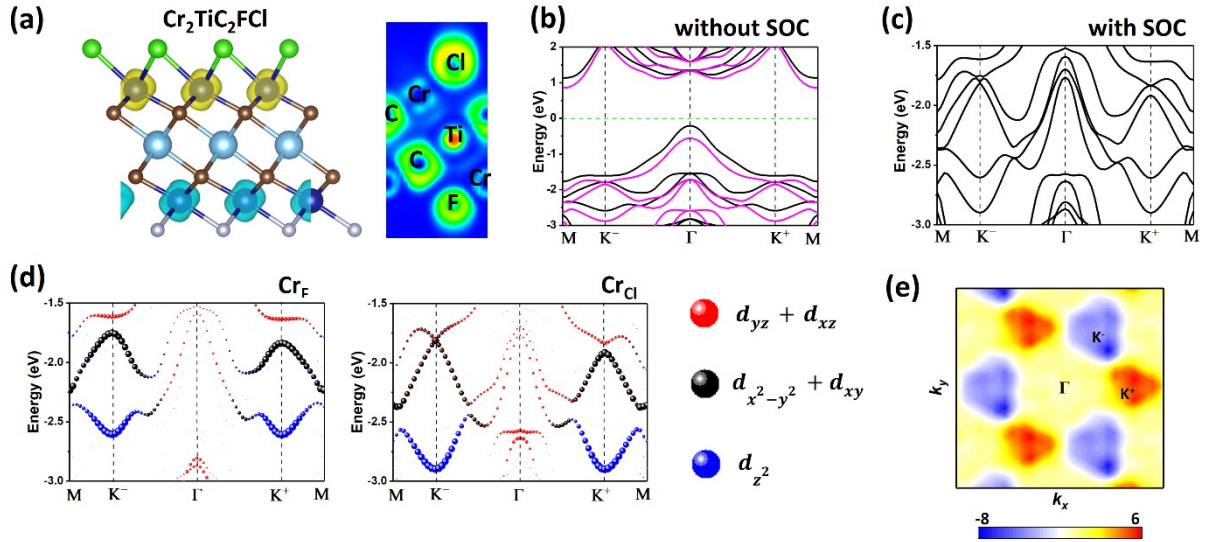

**Fig. S14** (a) Spin polarized charge densities and electron localization functions. Spin-up and spin-down densities are shown in yellow and blue, respectively. The isosurface is  $0.045 \text{ e} \cdot \text{Bohr}^{-3}$ . The color scale (from 0 to 1) shows the probability. (b) Band structures at HSE06 level. Spin-up and spin-down bands are respectively denoted by black and pink lines. (c) Band structures with spin-orbit coupling (SOC). (d) Orbital projected band structures with SOC. Red, black and blue circles represent  $d_{yz} + d_{xz}$ ,  $d_{x^2-y^2} + d_{xy}$  and  $d_{z^2}$  orbital composition. The sizes of dots denote the weight of contribution. (e) Berry curvatures in the full Brillouin zone. Unit of Berry curvatures is  $\text{\AA}^2$ .

**Table S1** Four types of functionalization adsorption sites on  $\text{Cr}_2\text{CX}_2$  and Janus  $\text{Cr}_2\text{COX}$  MXenes. The most stable type is set up to zero for each MXenes.

| MXenes                             | Type I | Type II | Type III | Type VI |
|------------------------------------|--------|---------|----------|---------|
| $\text{Cr}_2\text{CF}_2$           | 0.52   | 0.00    | 0.17     | /       |
| $\text{Cr}_2\text{CCl}_2$          | 0.56   | 0.00    | 0.23     | /       |
| $\text{Cr}_2\text{C}(\text{OH})_2$ | 2.64   | 0.00    | 0.13     | /       |
| $\text{Cr}_2\text{COF}$            | 0.40   | 0.00    | 0.22     | 0.33    |
| $\text{Cr}_2\text{COCl}$           | 0.82   | 0.00    | 0.59     | 0.38    |
| $\text{Cr}_2\text{COOH}$           | 0.21   | 0.00    | 0.12     | 0.21    |

**Table S2** Calculated structural and magnetic characteristics of  $\text{Cr}_2\text{CX}_2$  and Janus  $\text{Cr}_2\text{COX}$  MXenes. L is the lattice constant ( $\text{\AA}$ ). Cr-C and Cr-X(X') are bond lengths ( $\text{\AA}$ ). Magnetic states include ferromagnetic (FM) and antiferromagnetic (AFM) states. M is magnetic moment ( $\mu_B$ ).  $J_1$ ,  $J_2$  and  $J_3$  are coupling constants (meV).  $T_C/T_N$  stands for the Curie and Neel temperatures (K). Band gaps are in spin-up and spin-down channels (eV).  $\Delta K_{VBM}$  and  $\Delta K_{CBM}$  stands for the valley splitting (meV).

| MXenes                             | L ( $\text{\AA}$ ) | Cr-C                       | Cr-X(X')     | Magnetic states | M (Cr)                   | $J_1$  | $J_2$ | $J_3$ | $T_C/T_N$ | Gaps      |      | $\Delta K_{VBM}$ | $\Delta K_{CBM}$ |
|------------------------------------|--------------------|----------------------------|--------------|-----------------|--------------------------|--------|-------|-------|-----------|-----------|------|------------------|------------------|
|                                    |                    |                            |              |                 |                          |        |       |       |           | Up/down   |      |                  |                  |
| $\text{Cr}_2\text{CF}_2$           | 3.01               | 2.05                       | 2.12         | AFM             | $\pm 2.65$               | 62.14  | 22.11 | 56.07 | 3830      | 3.40/3.40 | /    | /                |                  |
| $\text{Cr}_2\text{CCl}_2$          | 3.13               | 2.02                       | 2.46         | AFM             | $\pm 2.74$               | 181.39 | 61.79 | 78.4  | 6095      | 2.28/2.28 | /    | /                |                  |
| $\text{Cr}_2\text{C}(\text{OH})_2$ | 3.02               | 1.99                       | 2.14 (Cr-OH) | AFM             | $\pm 2.79$               | 154.83 | 32.01 | 53.74 | 6095      | 1.55/1.55 | /    | /                |                  |
| $\text{Cr}_2\text{COF}$            | 2.94               | 1.99 (Cr <sub>F</sub> -C)  | 2.11(Cr-F)   | FM              | 2.90 (Cr <sub>F</sub> )  | 24.61  | 31.46 | 14.64 | 1146      | 0.40/3.46 | 334  | 421              |                  |
|                                    |                    | 2.17 (Cr <sub>O</sub> -C)  | 1.92(Cr-O)   |                 | 2.56 (Cr <sub>O</sub> )  |        |       |       |           |           |      |                  |                  |
| $\text{Cr}_2\text{COCl}$           | 2.98               | 1.96 (Cr <sub>Cl</sub> -C) | 2.44(Cr-Cl)  | FM              | 2.75 (Cr <sub>Cl</sub> ) | 14.37  | 50.55 | 8.74  | 622       | /2.54     | -149 | -139             |                  |
|                                    |                    | 2.10 (Cr <sub>O</sub> -C)  | 1.95(Cr-O)   |                 | 2.57 (Cr <sub>O</sub> )  |        |       |       |           |           |      |                  |                  |
| $\text{Cr}_2\text{COOH}$           | 2.95               | 1.99 (Cr <sub>OH</sub> -C) | 2.12(Cr-OH)  | FM              | 2.84 (Cr <sub>OH</sub> ) | 24.02  | 32.01 | 6.44  | 983       | /3.26     | 45   | 140              |                  |
|                                    |                    | 2.16 (Cr <sub>O</sub> -C)  | 1.93(Cr-O)   |                 | 2.59 (Cr <sub>O</sub> )  |        |       |       |           |           |      |                  |                  |

**Table S3** Calculated structural and magnetic characteristics of two mixed MXenes. L is the lattice constant ( $\text{\AA}$ ). Magnetic states include ferromagnetic (FM) and ferrimagnetic (FIM) states.  $T_C/T_N$  stands for the Curie and Neel temperatures (K). Band gaps are in spin-up and spin-down channels (eV).  $\Delta K_{VBM}$  and  $\Delta K_{CBM}$  stands for the valley splitting (meV).

| MXenes                                                | L ( $\text{\AA}$ ) | Magnetic states | $T_C/T_N$ | Gaps      |  | $\Delta K_{VBM}$ | $\Delta K_{CBM}$ |
|-------------------------------------------------------|--------------------|-----------------|-----------|-----------|--|------------------|------------------|
|                                                       |                    |                 |           | Up/down   |  |                  |                  |
| $\text{Cr}_2\text{CO}_{0.75}\text{F}_{1.25}$          | 5.96               | FIM             | 1648      | 0.97/0.46 |  | 11               | 11               |
| $\text{Cr}_8\text{C}_4\text{O}_{1.25}\text{F}_{0.75}$ | 5.75               | FM              | 314       | 0.31/2.66 |  | 15               | -12              |
